# Supplementary material for: In Vitro and In Vivo Anti-Candida Activity and Structural Analysis of Killer Peptide (KP)-Derivatives
Source: J Fungi (Basel). 2021 Feb 10;7(2):129. doi: 10.3390/jof7020129 (PMC7916522; doi:10.3390/jof7020129)
Supplement: Supplementary file 1 [file jof-07-00129-s001.pdf]

# In vitro and in vivo anti-Candida activity and structural analysis of killer peptide (KP)-derivatives

Tecla Ciociola <sup>1</sup>, Thelma A. Pertinhez <sup>1,2</sup>, Tiziano De Simone <sup>1</sup>, Walter Magliani <sup>1</sup>, Elena Ferrari <sup>1</sup>, Silvana Belletti <sup>1</sup>, Tiziana D'Adda <sup>1</sup>, Stefania Conti <sup>1,\*</sup> and Laura Giovati <sup>1</sup>

<sup>1</sup> Department of Medicine and Surgery, University of Parma, Parma 43126, Italy; tecla.ciociola@unipr.it (T.C.); thelma.pertinhez@unipr.it (T.A.P.); tiziano.desimone@unipr.it (T.D.S.); walter.magliani@unipr.it (W.M.); elena.ferrari@unipr.it (E.F.); silvana.belletti@unipr.it (S.B.); tiziana.dadda@unipr.it (T.D.); laura.giovati@unipr.it (L.G.)

<sup>2</sup> Transfusion Medicine Unit, Azienda USL-IRCCS di Reggio Emilia, Reggio Emilia 42122, Italy

\* Correspondence: [stefania.conti@unipr.it](mailto:stefania.conti@unipr.it)

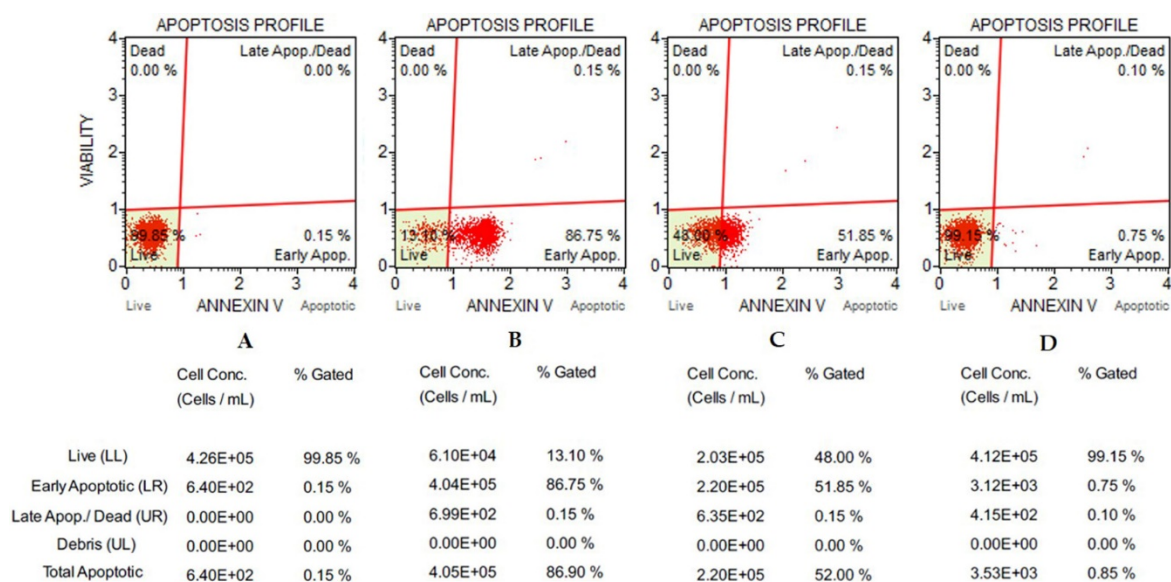

**Figure S1.** Apoptotic profile of *Candida albicans* cells treated with KP and selected derivatives. (A): untreated control cells. (B): KP-treated cells. (C): H10S-treated cells. D: K10S-treated cells. Yeast cells ( $5 \times 10^5$  cells/ml) were treated for 30 minutes with peptides at  $2 \times$  their  $EC_{50}$  values. LL: lower left quadrant; LR: lower right quadrant; UR: upper right quadrant; UL: upper left quadrant. Apoptotic profile was evaluated by the Muse Cell Analyzer (Merck Millipore) using the Muse Annexin V & Dead Cell Assay kit. Reported data derived from a single representative experiment.

**Table S1.** In vitro cytotoxic activity of KP and its derivatives against LLC-MK2 cells.

| Peptide   | Cell viability (%) |            |            |
|-----------|--------------------|------------|------------|
|           | 10 $\mu$ M         | 25 $\mu$ M | 50 $\mu$ M |
| A10S (KP) | 93.59              | 88.20      | 89.71      |
| H10S      | 96.77              | 94.90      | 90.99      |
| K10S      | 93.74              | 100        | 90.95      |
| L10S      | 95.70              | 93.44      | 98.07      |
| P10S      | 93.25              | 90.20      | 89.77      |
| S10S      | 99.77              | 99.75      | 91.09      |
| Y10S      | 96.89              | 95.35      | 97.18      |
| K9S       | 100                | 98.55      | 95.86      |
